# Supplementary material for: Effects of Serotonin on Cell Viability, Permeability of Bovine Mammary Gland Epithelial Cells and Their Transcriptome Analysis
Source: MDPI journal article supplement (doi:10.3390/ijms241411388), 2023-07-13
Supplement: s1 [file s1]

Table S1. primer sequences of selected genes.

| Gene Name                                | Gene Symbol    | GenBank Accession No. | Primer Sequence (5'-3')                           |
|------------------------------------------|----------------|-----------------------|---------------------------------------------------|
| Claudin 1                                | CLDN-1         | NM_001001854.2        | F:CGGTCAATGCCAGGTATG<br>R:CTGGGTGTTGGGTAAGATG     |
| Claudin 4                                | CLDN-4         | NM_001014391.2        | F:CCAACTGTGTGGATGATGAG<br>R:CGCGGATGACGTTGTTAG    |
| Claudin 8                                | CLDN-8         | NM_001098096.1        | F:GAGAGTGTCTGCCTTCATTG<br>R:AGCAGCGAGTCGTAGATT    |
| ZO-1                                     | TJP1           | XM_015468497.1        | F:CTTTACGAGCTCCAGGCACT<br>R:GGGGTCCTTCCTGTACACCT  |
| ZO-2                                     | TJP2           | NM_001102482.1        | F:GGAATCGGACAAGCCTAT<br>R:GACCGGTTCTGGTCATTTC     |
| E-cadherin                               | CDH1           | NM_001002763.1        | F:GCCAACGAGCTGATACAC<br>R:CGGCATGAGAGAAGAGAATG    |
| Transforming growth factor beta 1        | TGF- $\beta$ 1 | NM_001166068.1        | F:GGACCTGGGCTGGAAGTG<br>R:CTGCTCCACCTTGGGCTT      |
| Caspase-3                                | CASP3          | NM_001077840.1        | F:AAGCCATGGTGAAGAAGGAA<br>R:CCTCAGCACCCTGTCTGTC   |
| Stearoyl-CoA desaturase                  | SCD-1          | NM_173959.4           | F:CTACACAACCACCACCACCA<br>R:CAGGGCACCCATCAGATAGT  |
| Fatty acid synthase                      | FASN           | NM_001012669.1        | F:CCCTGAATGTGAGGCAGTGTG<br>R:TTAGCTGTGGTGAGGAGCCA |
| Acetyl-CoA carboxylase alpha             | ACACA          | NM_174224.2           | F:CTTCTGTGATTCCCCACCCC<br>R:GTTTCATCCCTGGGGACCTTG |
| Glyceraldehyde-3-phosphate dehydrogenase | GAPDH          | NM_001034034.2        | F:GATGCTGGTGCTGAGTATG<br>R:CAGAAGGTGCAGAGATGATG   |
| Ribosomal protein S9                     | RPS-9          | NM_001101152.2        | F:GGAGACCCTTCGAGAAGTCC<br>R:CTTTCTCATCCAGCGTCAGC  |
